# Supplementary material for: In Vitro Modulation of Complement Activation by Therapeutically Prospective Analogues of the Marine Polychaeta Arenicin Peptides
Source: MDPI journal article supplement (doi:10.3390/md20100612), 2022-09-28
Supplement: s1 [file s1]

# Supplementary Information

## ***In vitro* modulation of complement activation by therapeutically prospective analogues of the marine polychaeta arenicin peptides**

**Ilia A. Krenev <sup>1</sup>, Pavel V. Panteleev <sup>2</sup>, Ekaterina S. Umnyakova <sup>1,3</sup>, Nikolay P. Gorbunov <sup>4</sup>, Valeria A. Kostevich <sup>4</sup>, Sergey V. Balandin <sup>2</sup>, Tatiana V. Ovchinnikova <sup>2,5</sup>, Galina M. Aleshina <sup>1</sup> and Mikhail N. Berlov <sup>1,\*</sup>**

<sup>1</sup> Department of General Pathology and Pathological Physiology, Institute of Experimental Medicine, Acad. Pavlov Str. 12, 197376 Saint Petersburg, Russia

<sup>2</sup> M.M. Shemyakin and Yu. A. Ovchinnikov Institute of Bioorganic Chemistry, Russian Academy of Sciences, Miklukho-Maklaya Str., 16/10, 117997 Moscow, Russia

<sup>3</sup> Department of Pharmaceutical Sciences, University of Basel, Klingelbergstrasse 50, 4056 Basel, Switzerland

<sup>4</sup> Department of Molecular Genetics, Institute of Experimental Medicine, Acad. Pavlov Str. 12, 197376 Saint Petersburg, Russia

<sup>5</sup> Department of Biotechnology, I.M. Sechenov First Moscow State Medical University, Trubetskaya Str., 8-2, 119991 Moscow, Russia

\* Correspondence: berlov.mn@iemspb.ru; Tel.: +7-911-936-9839

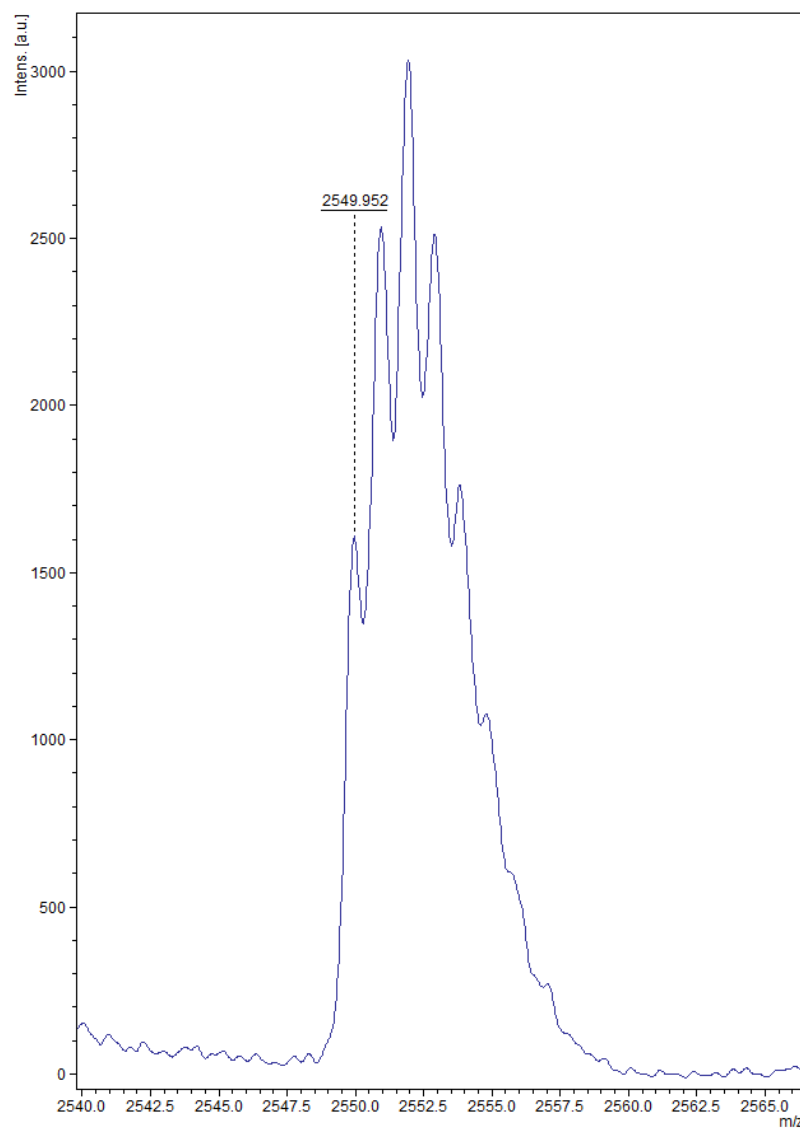

**Figure S1.** MALDI-MS analysis of the recombinant AA139. Calculated  $[M+H]^+$  monoisotopic molecular mass of AA139 is of 2549.17.

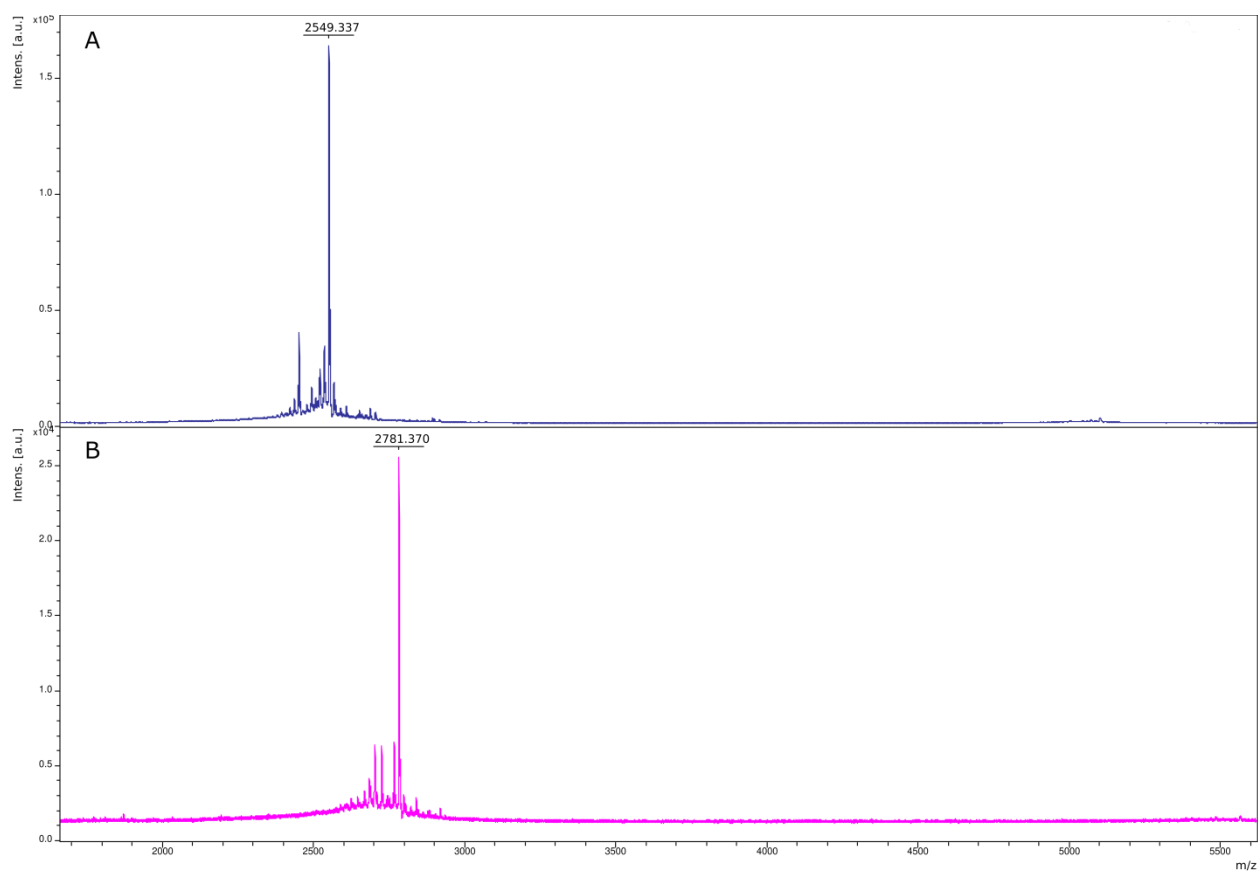

**Figure S2.** MALDI-MS analysis of the recombinant AA139 after incubation with iodoacetamide (IAA) w/o (A) or after (B) the addition of DTT. The difference between the two m/z values (232 Da) corresponds to 4 acetamide residues which indicates the absence of free thiol groups in the recombinant peptide.

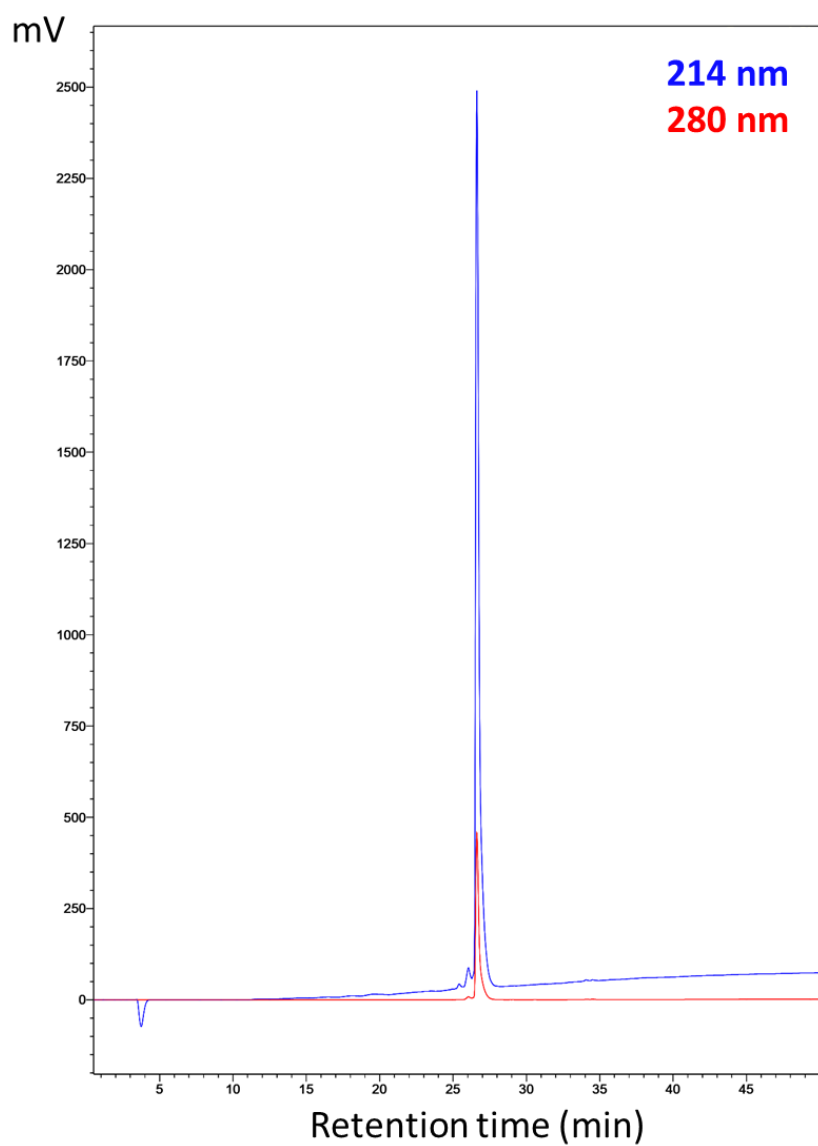

**Figure S3.** Repurification of the recombinant AA139. RP-HPLC was performed using the analytical column (Symmetry 300 C18) at a flow rate of 1 mL/min in a linear gradient of solution B (80% acetonitrile, 0.1% TFA) in solution A (5% acetonitrile, 0.1% TFA): 0-100% for 50 min.

**Table S1.** Evaluation of the hemolytic activity of arenicin analogues in heat-inactivated serum. Peptides at 160 µg/mL were incubated with Er<sup>sh</sup> or Er<sup>rab</sup> in presence of heat-inactivated serum at +37°C for 30 minutes, then the samples were diluted with PBS as described in section 4.3. For 100% lysis, distilled H<sub>2</sub>O was added to the samples instead of PBS. The average values from the two experiments are shown.

|                 | OD <sub>414</sub> |                   |
|-----------------|-------------------|-------------------|
|                 | Er <sup>sh</sup>  | Er <sup>rab</sup> |
| 100% lysis      | 0.995             | 0.878             |
| Without peptide | 0.006             | 0.002             |
| Ar-1[V8R]       | 0.003             | 0.002             |
| ALP1            | 0.005             | 0.004             |
| AA139           | 0.003             | 0.003             |
